# Supplementary material
Source: Springer Nature journal article supplement (https://www.springermedizin.de/resource/supplementary/12967_2009_401_MOESM4_ESM.pdf/9576394)

**A**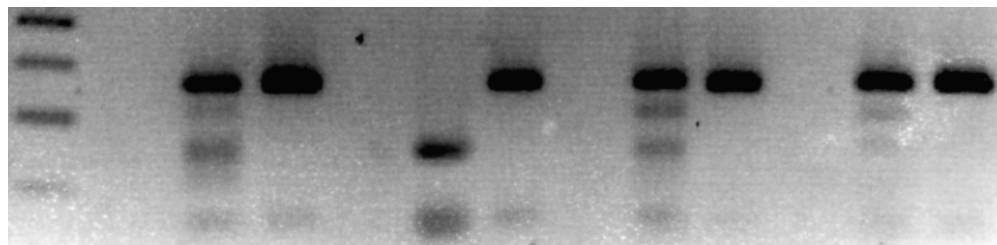

100 bp ladder

+ -

MZ2874TU

+ -

MZ1940RC

+ -

MZ2876TU

+ -

MZ2878TU

Taq I

**B**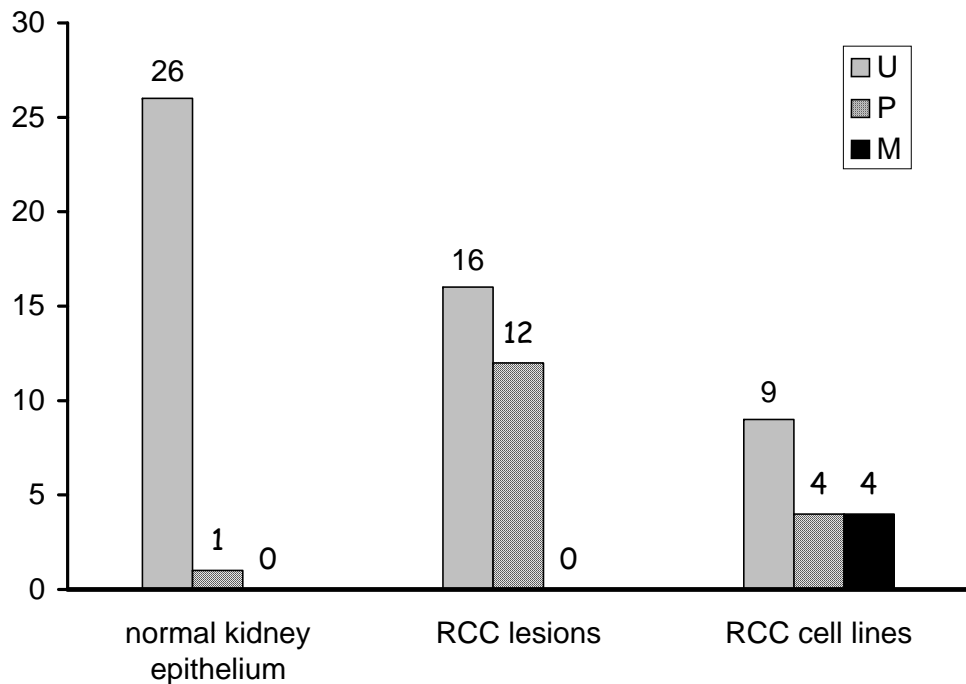

Supplement: MOESM4 [file 9576394]
